# Supplementary material
Source: PubMed Central journal article supplement (PMC8612755)
Supplement: mmc1.pdf [file mmc1.pdf]

# Supplemental Data

## Resolvin T-series Reduce Neutrophil Extracellular Traps

Nan Chiang<sup>1</sup>, Miyuki Sakuma<sup>2</sup>, Ana R. Rodriguez<sup>3</sup>, Bernd W. Spur<sup>3</sup>, Daniel Irimia<sup>2</sup>,  
Charles N. Serhan<sup>1</sup>

<sup>1</sup>Center for Experimental Therapeutics and Reperfusion Injury, Department of Anesthesiology, Perioperative and Pain Medicine, Brigham and Women's Hospital and Harvard Medical School, Boston, Massachusetts 02115, USA

<sup>2</sup>BioMEMS Resource Center, Center for Engineering in Medicine and Surgical Services, Massachusetts General Hospital, Shriners Hospital for Children, and Harvard Medical School, Boston, Massachusetts 02129, USA

<sup>3</sup>Department of Cell Biology and Neuroscience, Rowan University-SOM, Stratford, New Jersey 08084, USA.

*Address correspondence and reprint requests to:*

Prof. Charles N. Serhan, Director

Center for Experimental Therapeutics and Reperfusion Injury,

60 Fenwood Rd., Hale Building for Transformative Medicine 3-016, Boston, Massachusetts 02115, USA.

Phone: 617-525-5001; Fax: 617-525-5017

E-mail: [cserhan@bwh.harvard.edu](mailto:cserhan@bwh.harvard.edu)

### **This PDF includes:**

Supplemental Methods

Figure S1-S5

## Supplemental Methods

### *MPO measurements*

Human PMNs were adhered onto 12-well plates ( $2 \times 10^6$  cells/well) in NET buffer, incubated with RvT1 (10 nM) or vehicle control for 15 min, followed by addition of IL-1 $\beta$  (50 ng/ml) for 4 hours at 37°C. Cells were washed twice with PBS and then incubated with S7 micrococcal nuclease (15 units/ml/well; Thermo Fisher Scientific) in NET buffer for 30 min at 37°C to cleave NETs. Supernatants containing NETs were collected for MPO determinations (R&D Systems, DY3174) following manufacturer's protocol.

### *S. aureus infection in murine dorsal air pouch*

Murine infectious exudates were collected. Total leukocyte counts were determined by light microscopy, and PMN percentages determined by differential counting using Wright-Giemsa stain kit (Thermo Scientific, Waltham, MA). For bacterial titers, aliquots of exudates were plated onto LB agar plates and cultured overnight at 37°C. For NET, exudate cells ( $2 \times 10^5$  cells) were incubated with Sytox Green (5  $\mu$ M) for 10 min and loaded onto the microfluidic NET device for quantification. In parallel, exudate cells ( $1 \times 10^5$  cells) were adhered onto a 96-well plate, incubated with Sytox Green (5  $\mu$ M) for 10 min and washed once with PBS. Fluorescence was determined using a SpectraMax M3 plate reader (Molecular Devices), and fluorescence of total DNA was determined following TritonX-100 lysis. Images were taken using a Keyence BZ-9000 (BIOREVO) inverted fluorescence phase-contrast microscope (20X objective) equipped with a monochrome/color switching camera using BZ-II Viewer software and BZ-II Analyzer (Keyence).

### *Preparation of human NETs for macrophage phagocytosis*

Freshly isolated human PMNs were adhered onto 6-well plates ( $10 \times 10^6$  cells/well) in NET buffer and incubated with PMA (20 nM) with Sytox Green (5  $\mu$ M) for 4 hours at 37°C. Supernatants were aspirated and cells washed twice with PBS. S7 micrococcal nuclease (15 units/ml; 2 ml/well) was then added for 30 min at 37°C to

cleave NETs. Supernatants containing NETs were collected and stored at -20°C. Approximately 100 µg DNA was obtained from 10x10<sup>6</sup> PMN.

#### *Immunofluorescence staining*

Human PMNs (2x10<sup>5</sup> cells/well) were stained with Sytox Green (5 µM), fixed in 4% paraformaldehyde, and in some experiments, stained with PE-conjugated anti-human CD66b IgG (1:200 dilution; BD Biosciences). In select experiments, human MΦs (100,000 cells/well) with ingested NETs were stained with (1) PKH26 red (1:1000 dilution, Millipore Sigma, St. Louis, MO), or (2) anti-pAMPK IgG (1:100 dilution; Cell Signaling, Catalog No. 2535), followed by PE-conjugated anti-rabbit IgG (1:200; eBioscience). Mouse MΦs with ingested NETs were stained with PE-conjugated anti-F4/80 IgG (1:200; eBioscience). Mouse exudates (2x10<sup>5</sup> cells/well) were stained with Sytox Green (5 µM), fixed in 4% paraformaldehyde, then stained with (1) PE-conjugated anti-mouse Ly-6G IgG (clone 1A8, Biolegend, San Diego, CA), or (2) goat anti-mouse MPO IgG (1:100 dilutions; DY3667, R&D Systems), followed by Cy<sup>TM</sup>3-conjugated Donkey anti-goat IgG (1:200 dilutions; cat no. 705-165-147, Jackson ImmunoResearch Laboratories, Inc., West Grove, Pennsylvania).

#### *Human macrophage differentiation and proliferation*

PBMCs were isolated by Ficoll-Histopaque-1077 density-gradient. Monocytes were adhered in PBS, and then cultured in complete RPMI-1640 medium (Lonza, NJ) containing 10% fetal calf serum and recombinant human GM-CSF (20 ng/ml; R&D Systems) for 7 days for macrophage (MΦ) differentiation to M0 phenotype. In select experiments, MΦ were polarized towards M1 and M2. Briefly, M1 MΦs were prepared from monocytes incubated with GM-CSF (20 ng/ml) for 7 days in RPMI-1640 medium, followed by LPS (100 ng/ml) and INF-γ (20 ng/ml) for 48 h. M2 was obtained by incubating monocytes with M-CSF (20 ng/ml) for 7 days followed by 20 ng/ml IL-4 for 48 h.

A

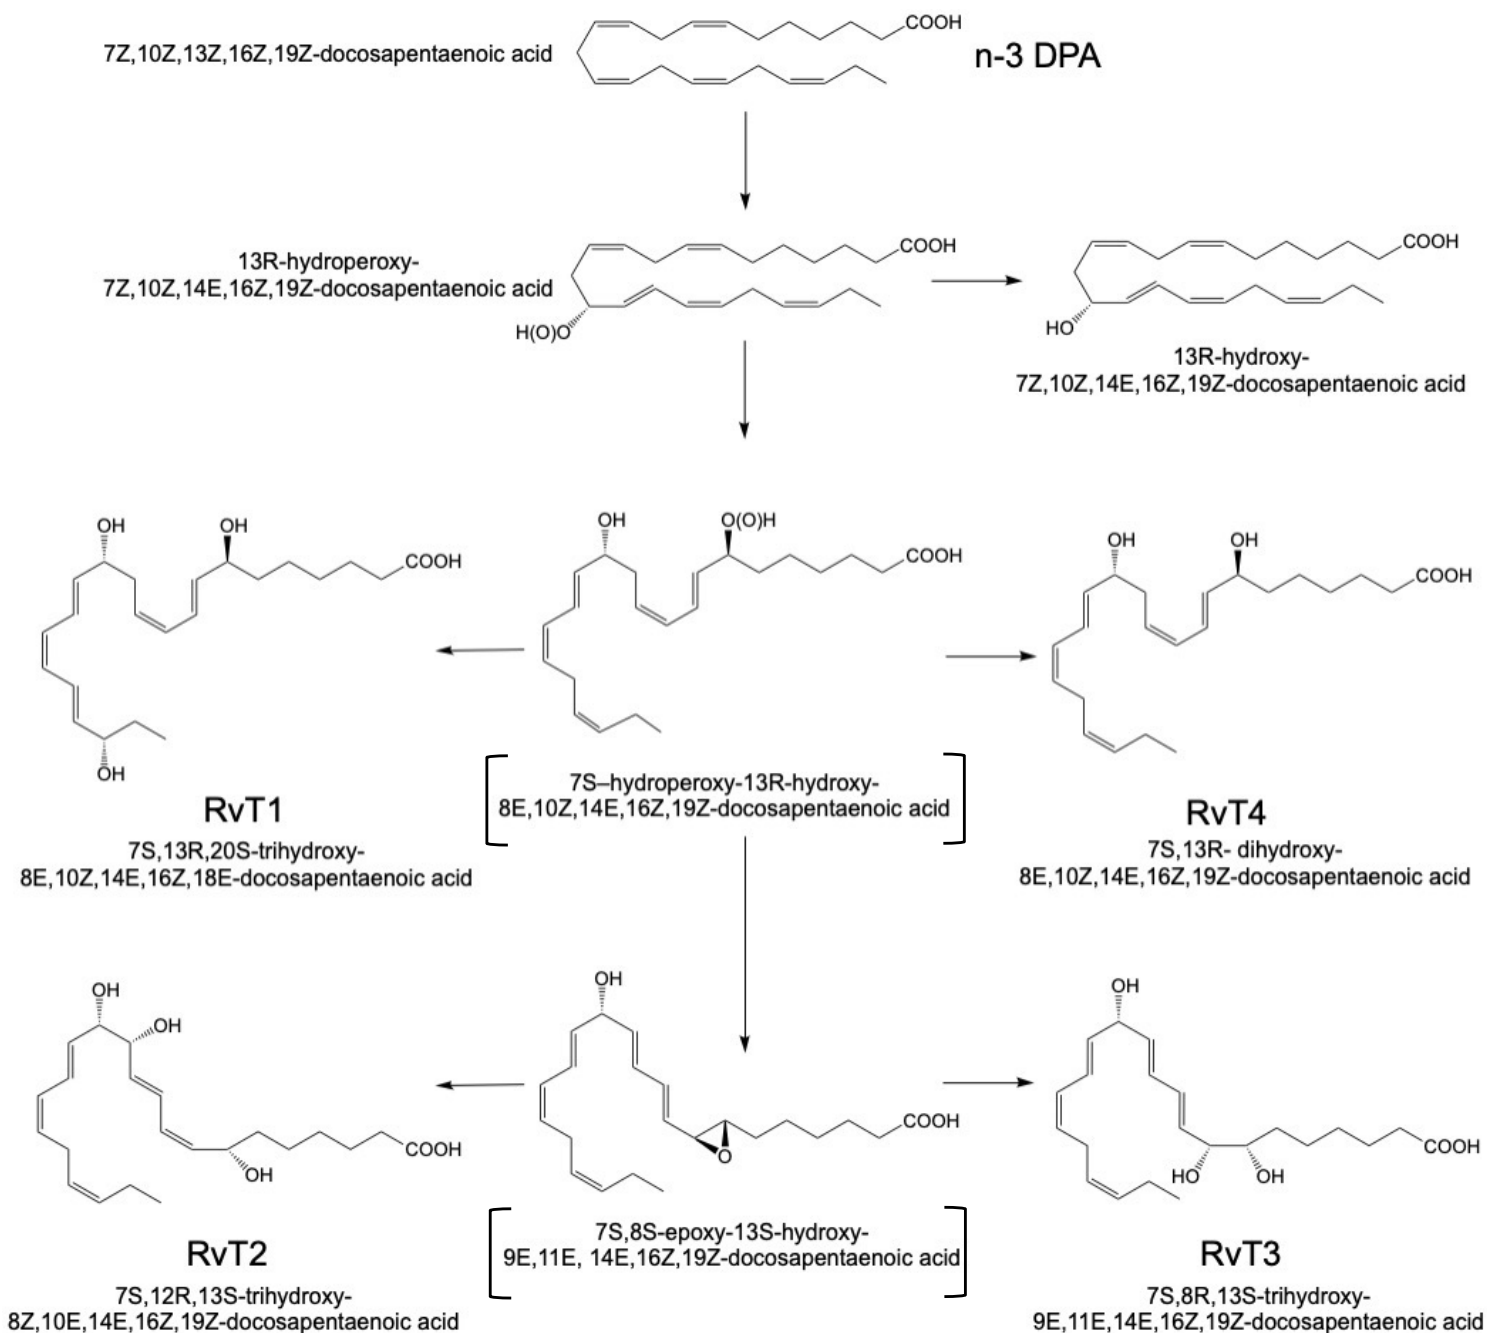

B

MS/MS

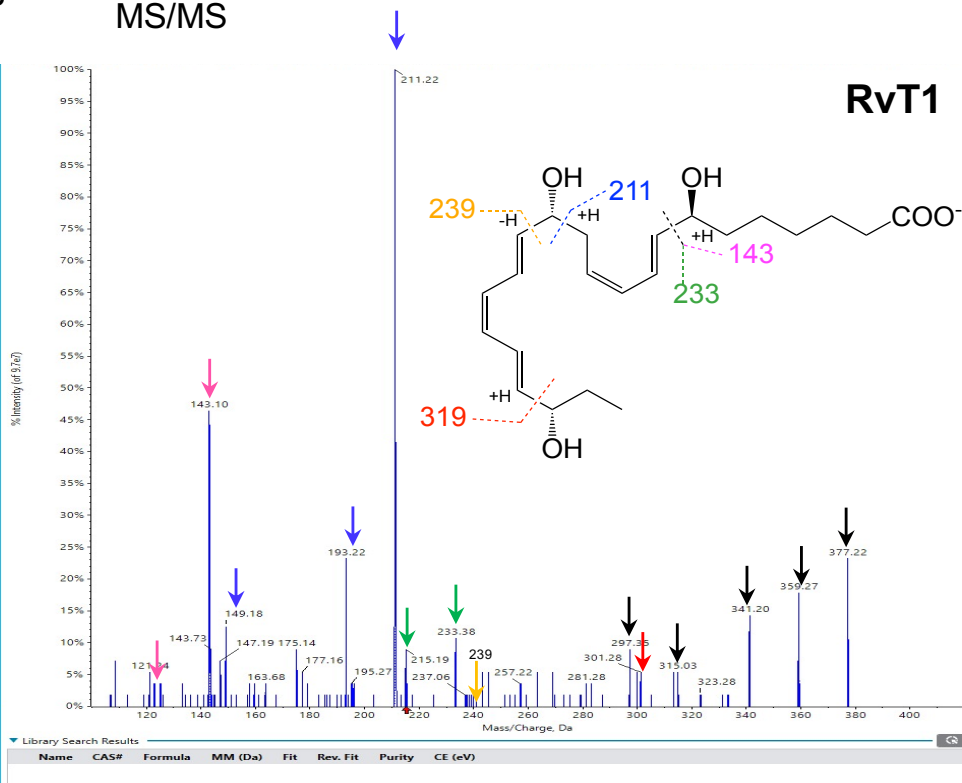

377=M-H  
 359=M-H-H<sub>2</sub>O  
 341=M-H-2H<sub>2</sub>O  
 315=M-H-H<sub>2</sub>O-CO<sub>2</sub>  
 301=319-H<sub>2</sub>O  
 297=M-H-2H<sub>2</sub>O-CO<sub>2</sub>  
 215=233-H<sub>2</sub>O  
 193=211-H<sub>2</sub>O  
 149=211-H<sub>2</sub>O-CO<sub>2</sub>  
 125=143-H<sub>2</sub>O

UV spectrum

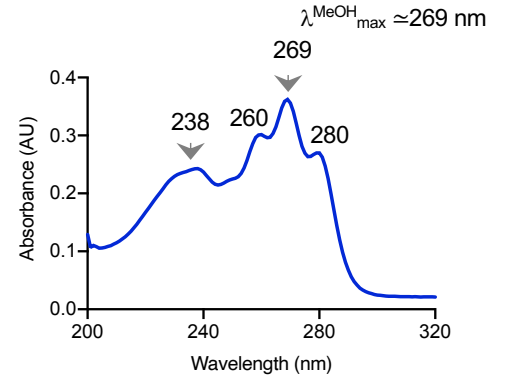

C

MS/MS

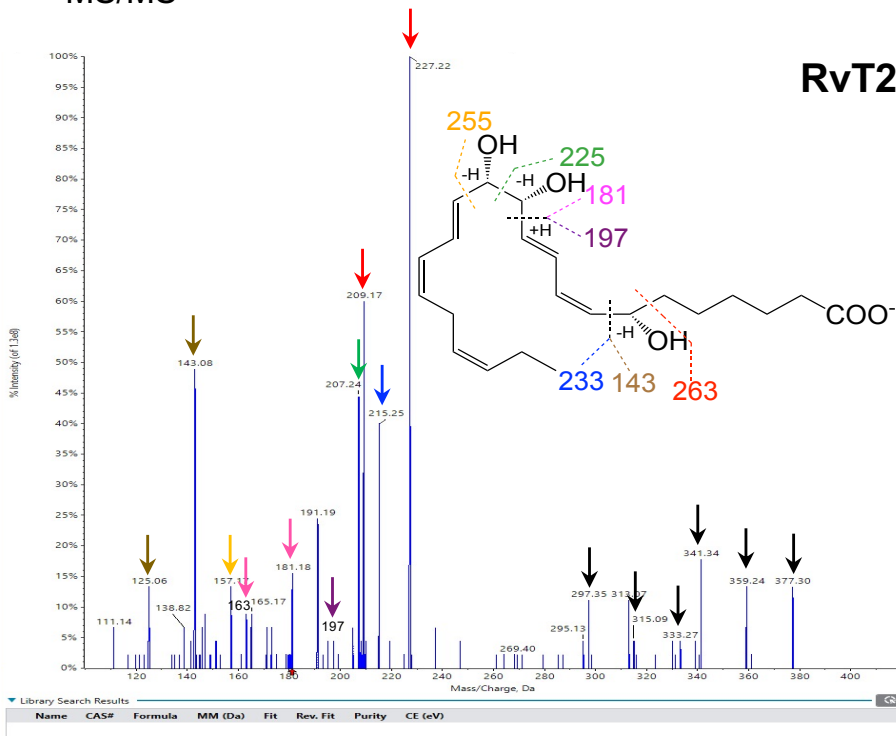

377=M-H  
 359=M-H-H<sub>2</sub>O  
 341=M-H-2H<sub>2</sub>O  
 333=M-H-CO<sub>2</sub>  
 315=M-H-H<sub>2</sub>O-CO<sub>2</sub>  
 297=M-H-2H<sub>2</sub>O-CO<sub>2</sub>  
 227=263-2H<sub>2</sub>O  
 209=263-3H<sub>2</sub>O  
 207=225-H<sub>2</sub>O  
 215=233-H<sub>2</sub>O  
 163=181-H<sub>2</sub>O  
 157=255-3H<sub>2</sub>O-CO<sub>2</sub>  
 125=143-H<sub>2</sub>O

UV spectrum

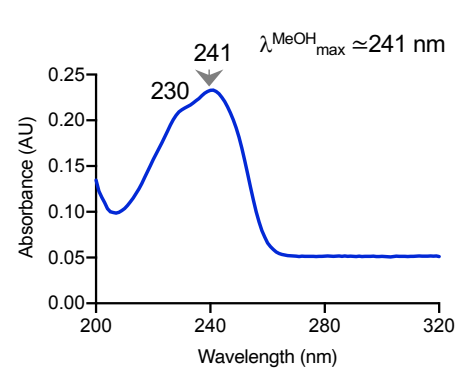

D

MS/MS

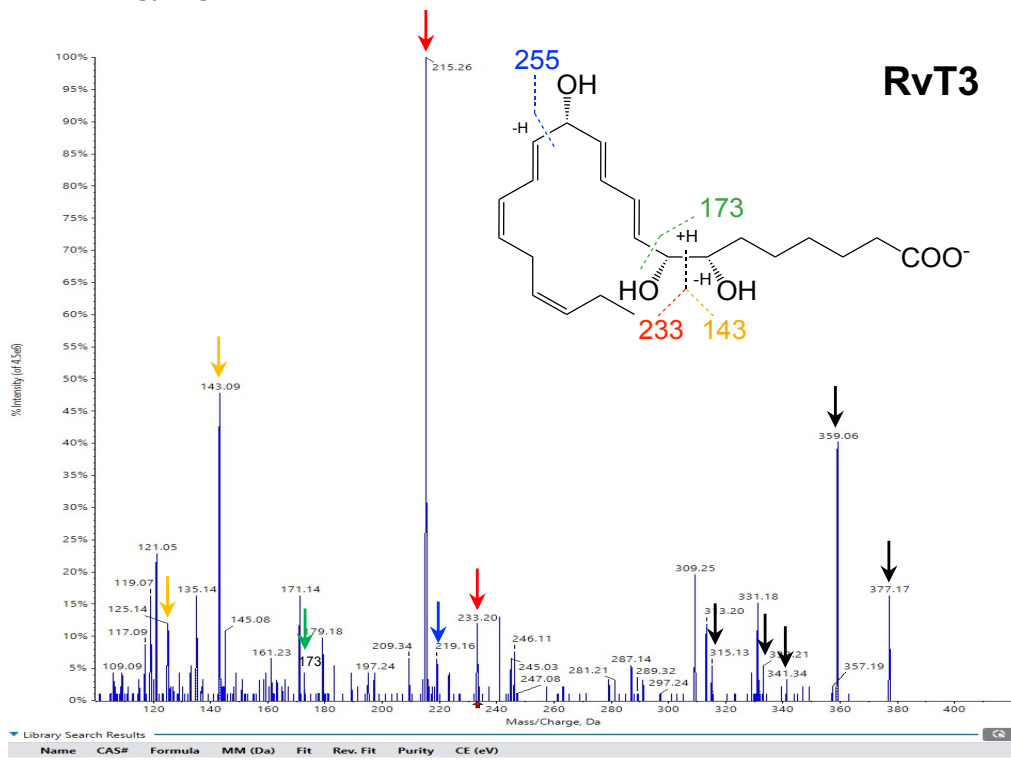

- 377=M-H
- 359=M-H-H<sub>2</sub>O
- 341=M-H-2H<sub>2</sub>O
- 333=M-H-CO<sub>2</sub>
- 315=M-H-H<sub>2</sub>O-CO<sub>2</sub>
- 215=233-H<sub>2</sub>O
- 219=255-2H<sub>2</sub>O
- 125=143-H<sub>2</sub>O

UV spectrum

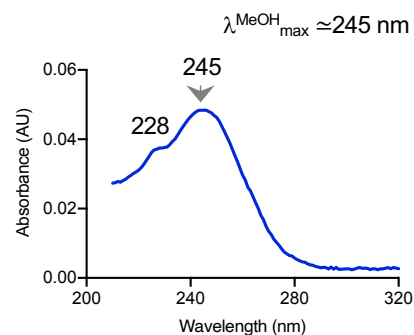

E

MS/MS

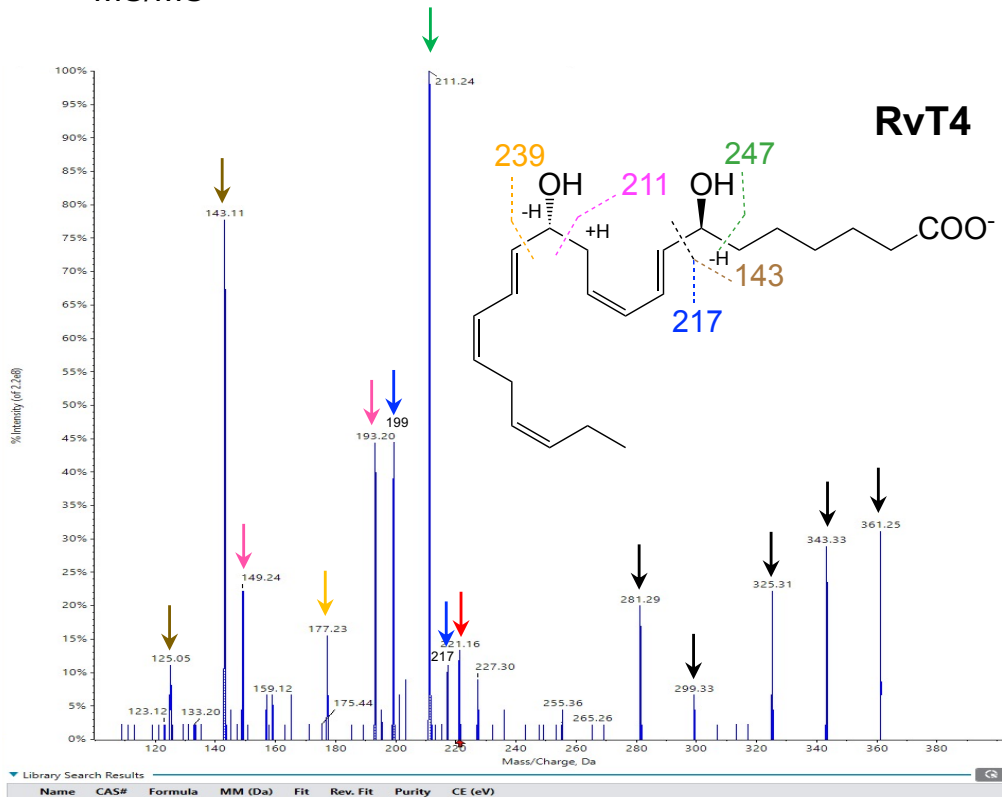

- 361=M-H
- 343=M-H-H<sub>2</sub>O
- 325=M-H-2H<sub>2</sub>O
- 299=M-H-H<sub>2</sub>O-CO<sub>2</sub>
- 281=M-H-2H<sub>2</sub>O-CO<sub>2</sub>
- 221=239-H<sub>2</sub>O
- 211=247-2H<sub>2</sub>O
- 199=217-H<sub>2</sub>O
- 193=211-H<sub>2</sub>O
- 149=211-H<sub>2</sub>O-CO<sub>2</sub>
- 177=239-H<sub>2</sub>O-CO<sub>2</sub>
- 125=143-H<sub>2</sub>O

UV spectrum

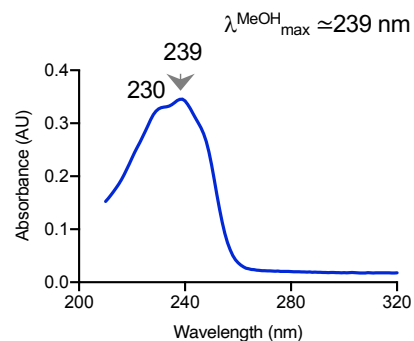

## Figure S1. Proposed biosynthesis of RvTs, and authentication of synthetic RvTs.

(A) Proposed biosynthesis of RvTs. RvT biosynthesis is initiated by conversion of n-3 DPA (Dalli *et al.*, 2015) to the intermediate 13R-HpDPA (13R-Hydroperoxy-7Z,10Z,13R,14E,16Z,19Z docosapentaenoic acid). This intermediate was prepared by total organic synthesis and its conversion was proven to RvT1, RvT2, RvT3 and RvT4 with human neutrophils (Primdahl *et al.*, 2016).

(B-E) MS/MS and UV spectra of RvT1, RvT2, RvT3 and RvT4.

Physical properties of each synthetic RvTs were examined and compared to published results for authentication (Dalli *et al.*, 2015; Primdahl *et al.*, 2016). LC-MS/MS was carried out in the negative ionization mode using a liquid chromatography-tandem linear ion trap quadrupole mass spectrometer system, QTRAP 6500+ (Sciex, Waltham, MA) equipped with a Sciex ExionLC (Sciex, Waltham, MA) as in Walker *et al.*, 2021. A Kinetex Polar C18 LC column (100mm x 4.6mm x 2.6 $\mu$ m; Phenomenex, Torrance, CA) was kept in a column oven maintained at 50°C. The RvTs were each eluted with a gradient of water/methanol/formic acid 55:45:0.1 (v/v/v) to 20:80:0.1 from 2.0–16.5 min, then by 20:80:0.1 to 2:98:0.1 from 16.5–16.6 min, followed by an isocratic elution at 2:98:0.1 from 16.6–18.5 min, and finally 2:98:0.1 to 90:10:0.1 until 20.5 min at a 0.5 mL/min flow rate. A targeted multiple reaction monitoring (MRM) method was devised with signature ion fragments for each molecule.

(B) RvT1 MS/MS fragments: m/z 377=M-H, 359=M-H-H<sub>2</sub>O, 341=M-H-2H<sub>2</sub>O, 315=M-H-H<sub>2</sub>O-CO<sub>2</sub>, 301=319-H<sub>2</sub>O, 297=M-H-2H<sub>2</sub>O-CO<sub>2</sub>, 239, 233, 215=233-H<sub>2</sub>O, 193=211-H<sub>2</sub>O, 149=211-H<sub>2</sub>O-CO<sub>2</sub>, 125=143-H<sub>2</sub>O. For UV spectrum, RvT1 possesses a conjugated triene, that gave a UV chromophore with  $\lambda_{\text{max}}^{\text{MeOH}} \approx 269$  nm and shoulders  $\approx 260$  and 280 nm, RvT1 also has a conjugated diene, giving a  $\lambda_{\text{max}}^{\text{MeOH}} \approx 238$  nm.

(C) RvT2 MS/MS fragments : m/z 377=M-H, 359=M-H-H<sub>2</sub>O, 341=M-H-2H<sub>2</sub>O, 333=M-H-CO<sub>2</sub>, 315=M-H-H<sub>2</sub>O-CO<sub>2</sub>, 297=M-H-2H<sub>2</sub>O-CO<sub>2</sub>, 227=263-2H<sub>2</sub>O, 209=263-3H<sub>2</sub>O, 207=225-H<sub>2</sub>O, 215=233-H<sub>2</sub>O, 197, 181, 163=181-H<sub>2</sub>O, 157=255-3H<sub>2</sub>O-CO<sub>2</sub>, 143, 125=143-H<sub>2</sub>O. For UV spectrum, RvT2 has double conjugated dienes, giving a UV chromophore with  $\lambda_{\text{max}}^{\text{MeOH}} \approx 241$  nm, and a shoulder  $\approx 230$  nm.

(D) RvT3 MS/MS fragments: m/z 377=M-H, 359=M-H-H<sub>2</sub>O, 341=M-H-2H<sub>2</sub>O, 333=M-H-CO<sub>2</sub>, 315=M-H-H<sub>2</sub>O-CO<sub>2</sub>, 233, 215=233-H<sub>2</sub>O, 219=255-2H<sub>2</sub>O, 173, 143, 125=143-H<sub>2</sub>O. For UV spectrum, RvT3 has double conjugated dienes, giving a UV chromophore with  $\lambda_{\text{max}}^{\text{MeOH}} \approx 245$  nm, and a shoulder  $\approx 230$  nm.

(E) RvT4 MS/MS fragments: m/z 361=M-H, 343=M-H-H<sub>2</sub>O, 325=M-H-2H<sub>2</sub>O, 299=M-H-H<sub>2</sub>O-CO<sub>2</sub>, 281=M-H-2H<sub>2</sub>O-CO<sub>2</sub>, 221=239-H<sub>2</sub>O, 211=247-2H<sub>2</sub>O, 199=217-H<sub>2</sub>O, 193=211-H<sub>2</sub>O, 149=211-H<sub>2</sub>O-CO<sub>2</sub>, 177=239-H<sub>2</sub>O-CO<sub>2</sub>, 143, 125=143-H<sub>2</sub>O. For UV spectrum, RvT4 has double conjugated dienes, giving a UV chromophore with  $\lambda_{\text{max}}^{\text{MeOH}} \approx 239$  nm, and a shoulder  $\approx 230$  nm.

## References:

Dalli, J., N. Chiang, and C.N. Serhan. 2015. Elucidation of novel 13-series resolvins that increase with atorvastatin and clear infections. *Nat. Med.* 21:1071-1075.

Primdahl, K.G., M. Aursnes, M.E. Walker, R.A. Colas, C.N. Serhan, J.Dalli, T.V. Hansen, A. Vik. 2016. Synthesis of 13(R)-Hydroxy-7Z,10Z,13R,14E,16Z,19Z Docosapentaenoic Acid (13R-HDPA) and Its Biosynthetic Conversion to the 13-Series Resolvins. *J Nat Prod.* 79:2693-2702.

Walker KH, Krishnamoorthy N, Brüggemann TR, Shay AE, Serhan CN, Levy BD. Protectins PCTR1 and PD1 Reduce Viral Load and Lung Inflammation During Respiratory Syncytial Virus Infection in Mice. *Front Immunol.* 2021 Aug 19;12:704427. doi: 10.3389/fimmu.2021.704427. PMID: 34489955; PMCID: PMC8417406.

A

PMN alone (vehicle control)

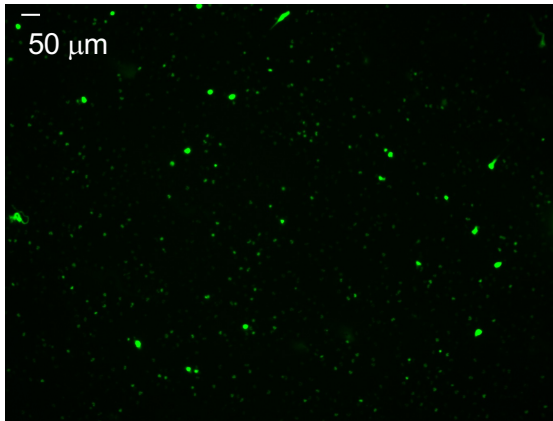

Sytox (DNA)

PMN + IL-1 $\beta$ 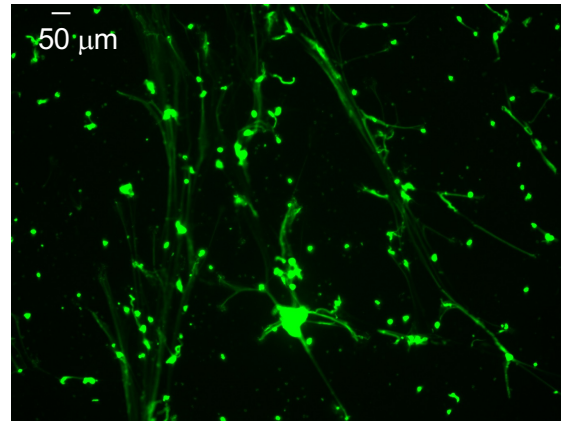

Sytox (DNA)

B

PMN + IL-1 $\beta$ 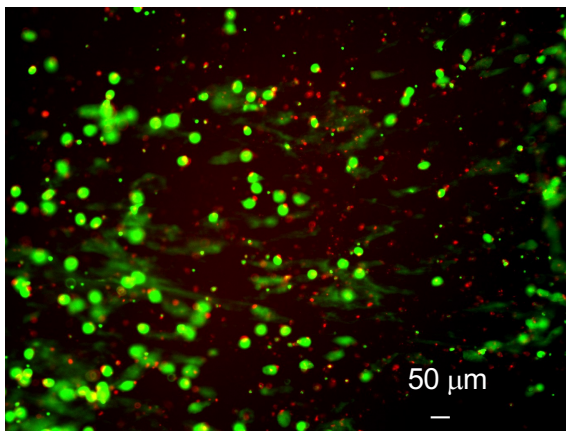Sytox (DNA)  
CD66b (PMN)PMN + IL-1 $\beta$ 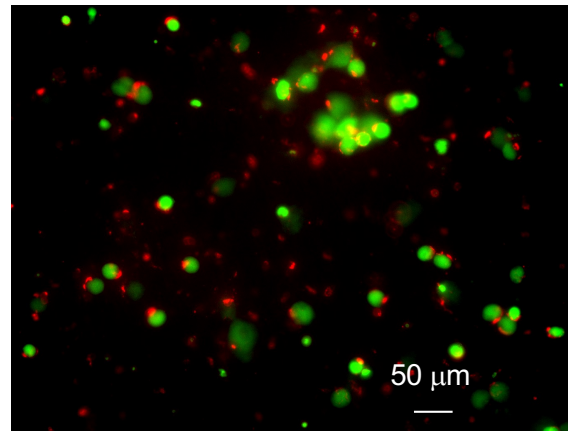Sytox (DNA)  
CD66b (PMN)

C

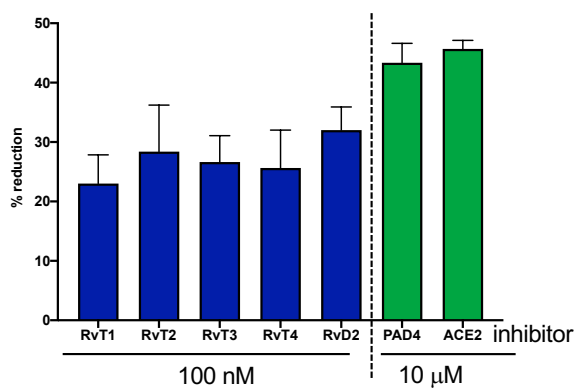**Figure S2. Human PMN NET formation and regulation by RvTs**

See Methods and figure legend of Figure 3 for experimental details.

(A,B) Human PMNs were incubated with vehicle or IL-1 $\beta$  for 4h. Green: Sytox Green for DNA, red: anti-CD66b for human PMN. Scale bars: 50  $\mu$ m.

(C) Comparisons of SPMs [100 nM] and a PAD4 inhibitor [10  $\mu$ M]; mean $\pm$ SEM; n=7 (SPM) or 3 (PAD4 inhibitor). No statistically significant differences were obtained using one-way ANOVA with Tukey's multiple comparisons.



A

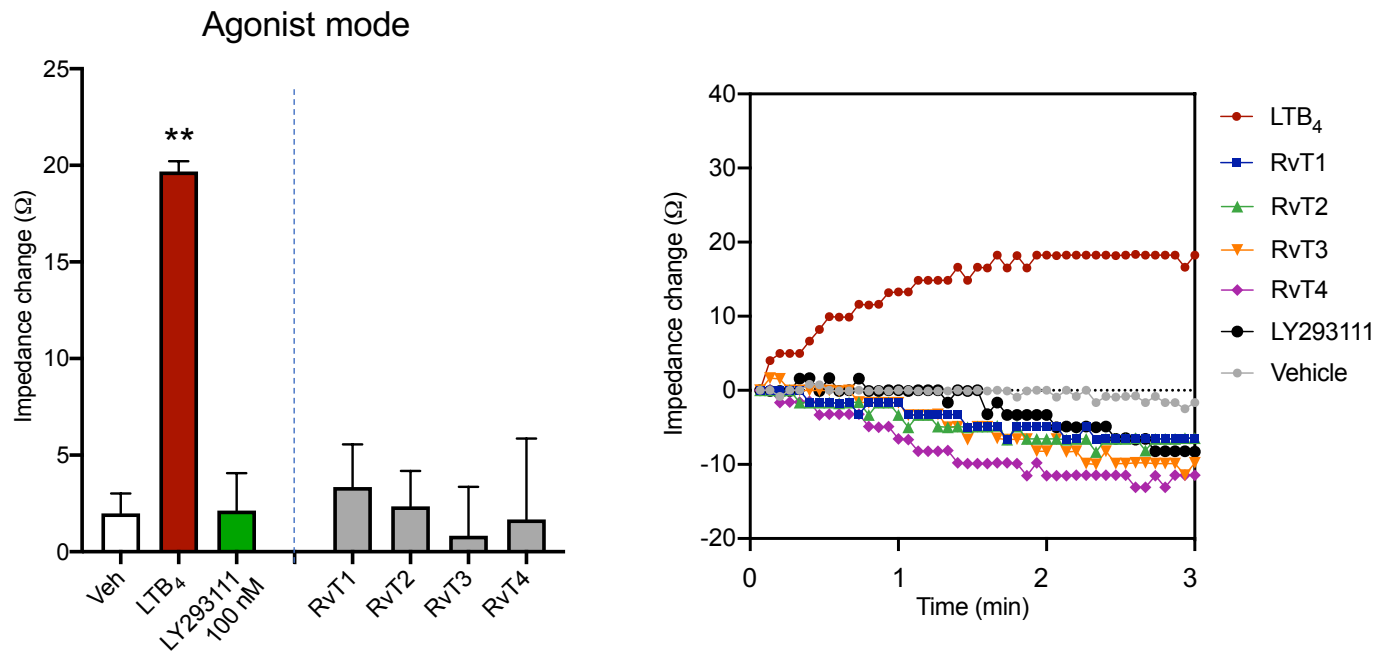

B

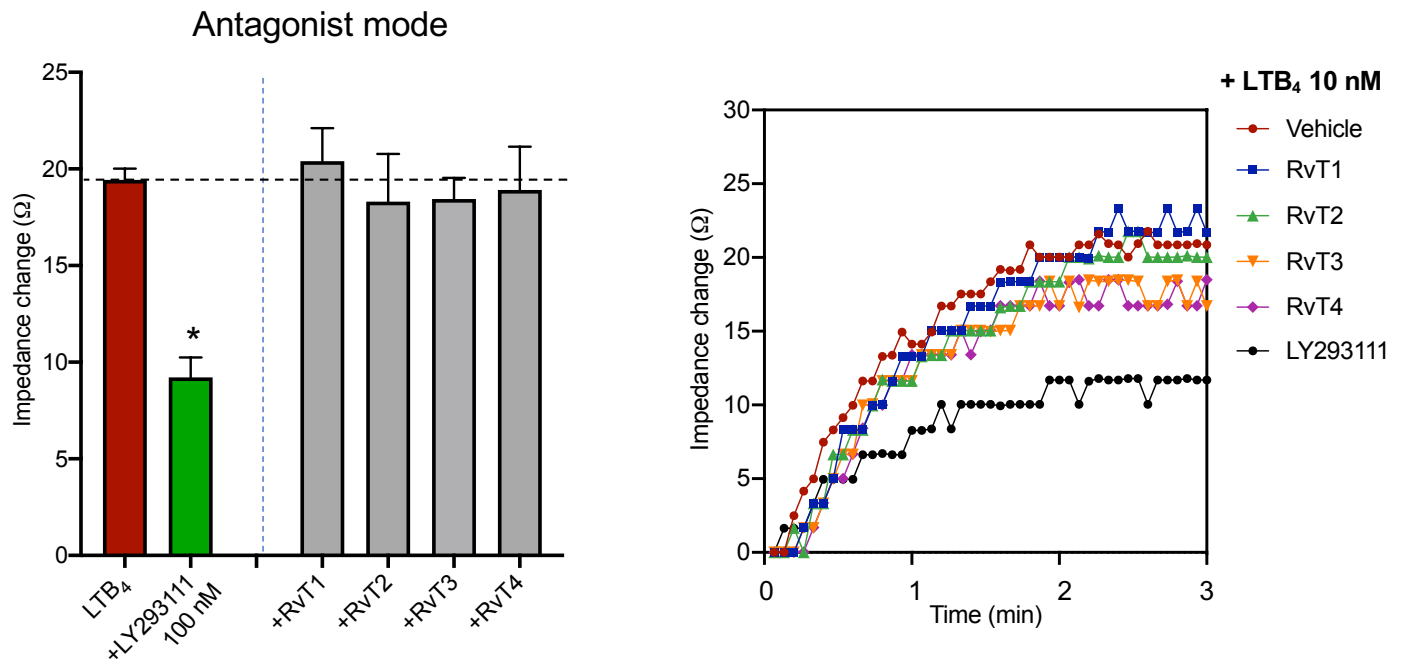

**Figure S3. RvTs do not activate or antagonize LTB<sub>4</sub> signals with human recombinant BLT1 receptor *in vitro***

Ligand-receptor interactions were monitored by measuring impedance changes in cultured CHO-hBLT1 cells using an ECIS system (Applied Biophysics). Cells were plated ( $1 \times 10^5$ /well in 8-well chamber slides), (A) incubated with vehicle, LTB<sub>4</sub>, RvT1, RvT2, RvT3, RvT4 (10nM) or a BLT1 antagonist (LY293111; 100 nM) for 10 min, followed by (B) addition of 10 nM LTB<sub>4</sub> for 10 min. (A,B) Results are (left panels) impedance changes; mean $\pm$ SEM; n = 3 independent experiments, and (right panels) real-time tracings from a representative experiment. (A) \*\*P<0.01 vs veh, LY293111, RvT1, RvT2, RvT3 and RvT4. (B) \*P<0.05 vs LTB<sub>4</sub>, LTB<sub>4</sub>+RvT1, LTB<sub>4</sub>+RvT2, LTB<sub>4</sub>+RvT3 and LTB<sub>4</sub>+RvT4; One-way ANOVA with Tukey multiple comparisons.

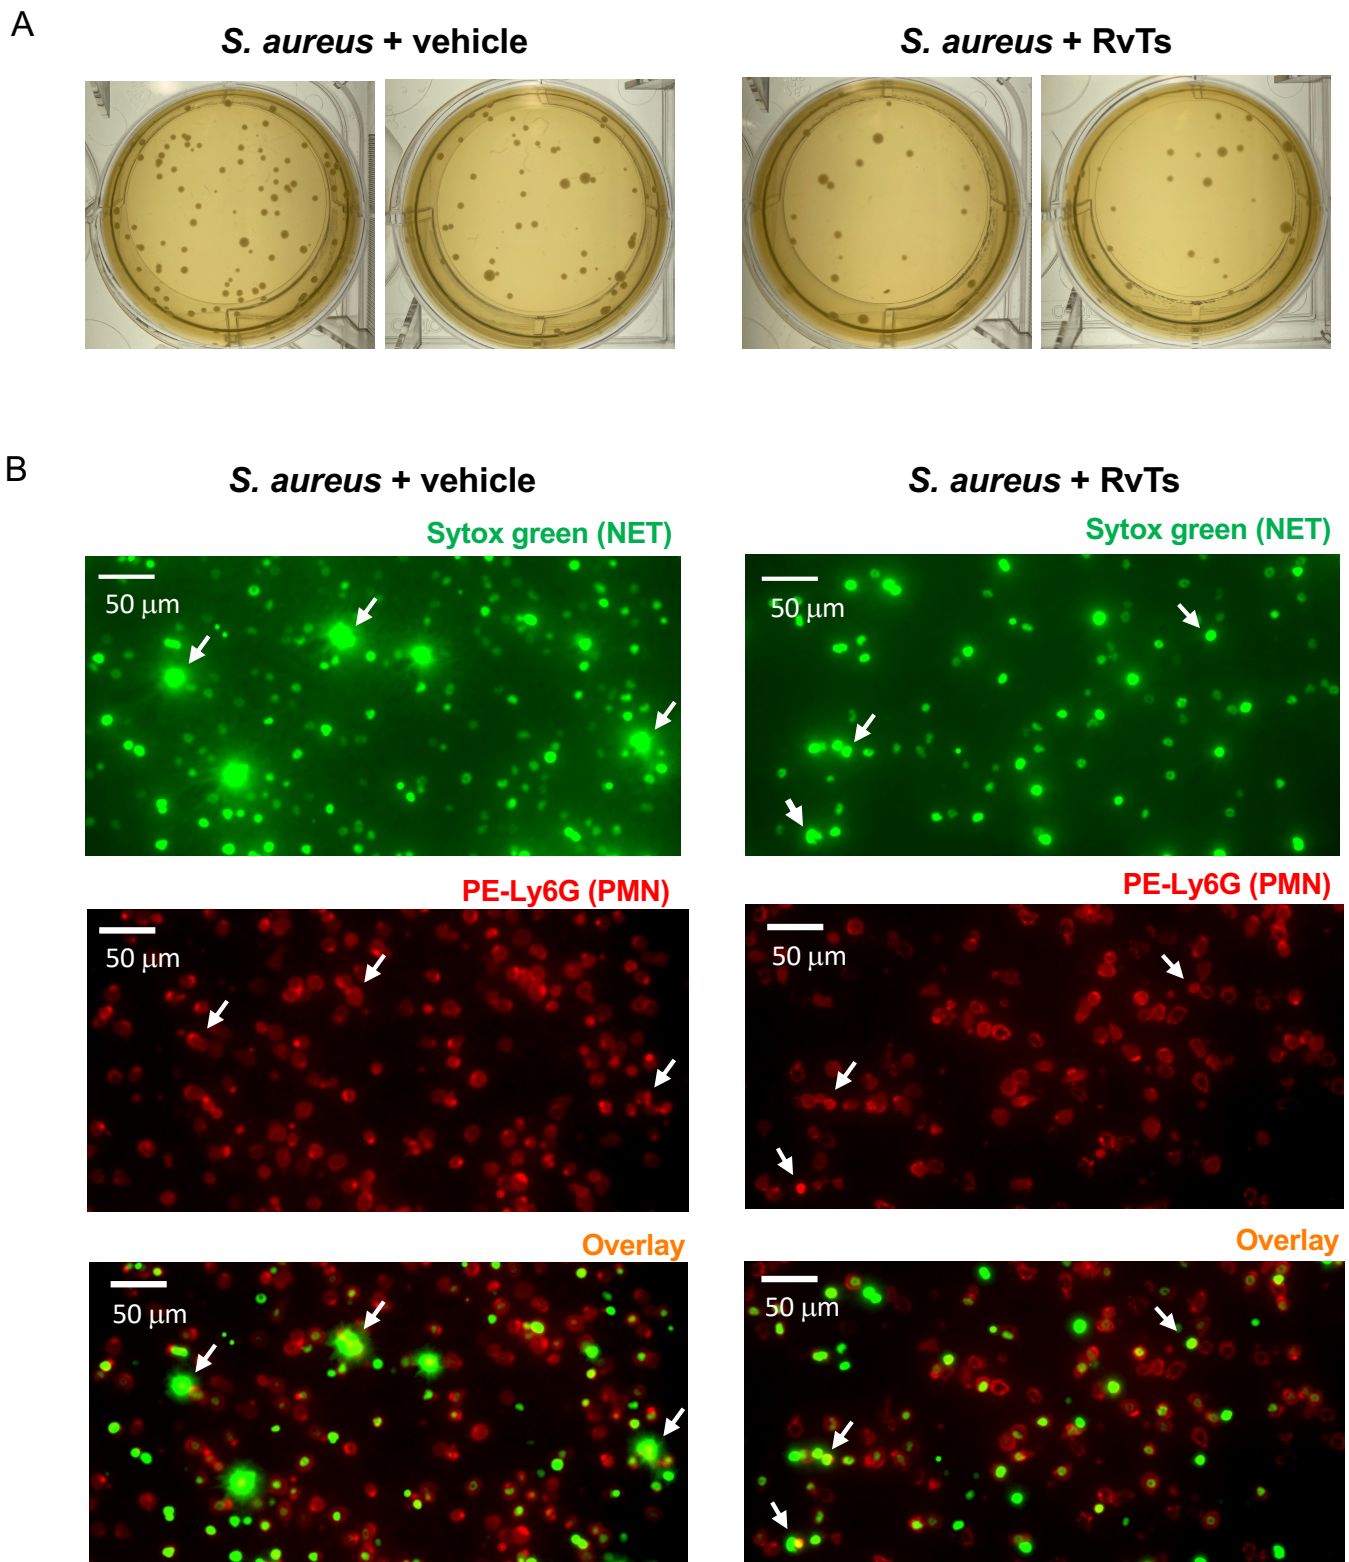

**Figure S4. Bacterial titers and NETs from *S. aureus* infected mice**

See Methods and figure legend of Figure 4 for experimental details.

(A) Representative images of bacterial titers from infectious exudates.

(B) Representative images of NETs in exudates collected from *S. aureus* infected mice with or without RvTs.

Green: Sytox Green; Red: PE-labeled anti-Ly-6G Ab for mouse PMN. NETs are indicated by arrows. Scale bars: 50  $\mu$ m.

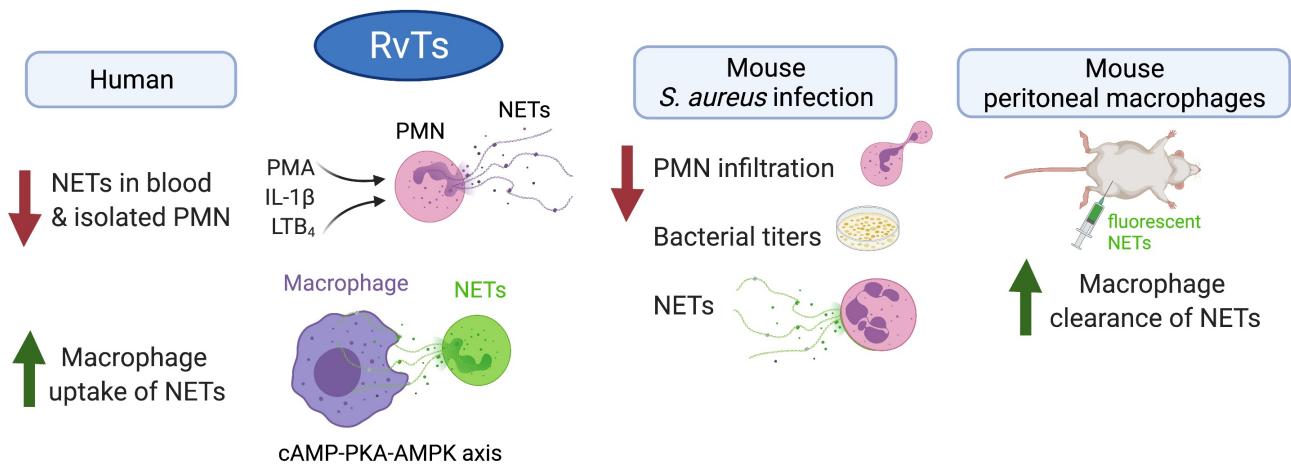

**Figure S5. Schematic summary: Resolvin T-series reduce NETosis and enhance macrophage clearance of NETs.**

RvTs reduced PMA-stimulated NETs in human blood, and IL-1 $\beta$  and LTB $_4$ -stimulated NETs with isolated PMN. With human M $\Phi$ , RvTs enhanced NET ingestion via cAMP-PKA-AMPK axis. In mice, RvTs limited *S. aureus* dermal infection and stimulated peritoneal M $\Phi$  clearance of NETs.
